# Supplementary material for: Relationship between personal care products usage and triclosan exposure: the second Korean National Environmental Health Survey (KoNEHS 2012–2014)
Source: Ann Occup Environ Med. 2019 Jan 28;31:2. doi: 10.1186/s40557-019-0283-y (PMC6348669; doi:10.1186/s40557-019-0283-y)
Supplement: Supplementary file 1 — Medians (interquartile range) of Urinary TCS concentration according to age. The urinary TCS concentration tended to decrease as age increased. (XLSX 11 kb) [file 40557_2019_283_MOESM1_ESM.xlsx]

## Sheet: Sheet1
	Supplementary table S1 Medians (interquartile range) of Urinary TCS concentration according to age
			Total	Male	Female		Total		Male		Female
	Category		n (%)	n (%)	n (%)		Medians (interquartile range)	p value	Medians (interquartile range)	p value	Medians (interquartile range)	p value
	Total		6,288 (100)	2,692 (100)	3,596 (100)		0.354 (0.354-1.213)		0.354 (0.354-1.097)		0.354 (0.354-1.331)
	Age (years)	19-29	513 (8.2)	251 (9.3)	262 (7.3)		0.517 (0.354-2.201)	<0.001	0.515 (0.354-1.879)	0.353	0.534 (0.354-2.441)	0.004
		30-39	1,031 (16.4)	426 (15.8)	605 (16.8)		0.354 (0.354-1.573)		0.354 (0.354-1.521)		0.354 (0.354-1.624)
		40-49	1,201 (19.1)	495 (18.4)	706 (19.6)		0.354 (0.354-1.289)		0.354 (0.354-1.048)		0.354 (0.354-1.576)
		50-59	1,401 (22.3)	560 (20.8)	841 (23.4)		0.354 (0.354-1.236)		0.354 (0.354-1.072)		0.354 (0.354-1.436)
		60-69	1,298 (20.6)	580 (21.5)	718 (20.0)		0.354 (0.354-0.855)		0.354 (0.354-0.692)		0.354 (0.354-1.010)
		≥70	844 (13.4)	380 (14.1)	464 (12.9)		0.354 (0.354-0.707)		0.354 (0.354-0.818)		0.354 (0.354-0.655)
	Data are medians (interquartile range), or number (%).
	p value calculated by ANOVA.
